# Supplementary material
Source: PubMed Central journal article supplement (PMC5858585)
Supplement: NIHMS948147-supplement-Supplemental_Figure_2.pdf [file NIHMS948147-supplement-Supplemental_Figure_2.pdf]

**A**

**Tumor patients**

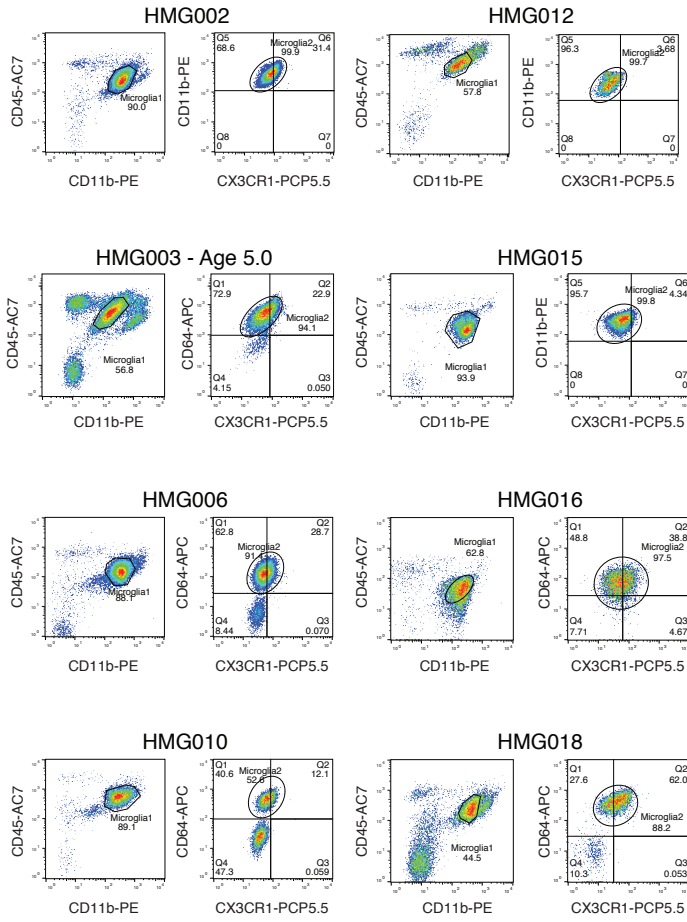

**Epilepsy patients**

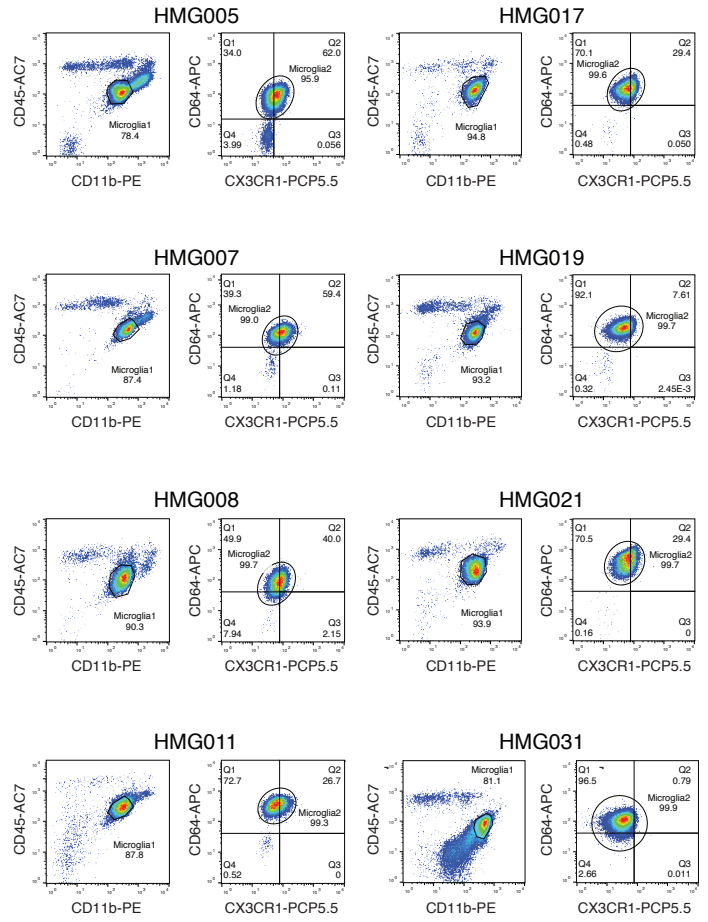

**Acute ischemia patients**

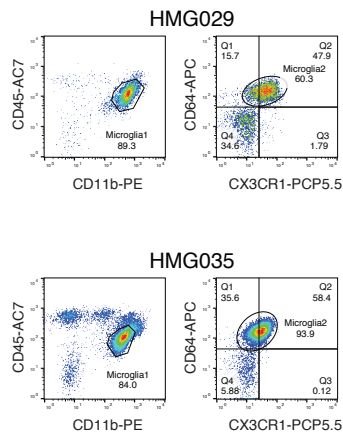

**B**

**Mean RNA expression levels (TPM)**

| Cell Specificity | Gene          | Cortex  | MG Ex Vivo | MG In vitro 7d | Monocytes |
|------------------|---------------|---------|------------|----------------|-----------|
| Myeloid          | <i>CSF1R</i>  | 54.2    | 1728.2     | 179.4          | 140.7     |
|                  | <i>SPI1</i>   | 22.4    | 253.3      | 295.5          | 849.2     |
|                  | <i>CX3CR1</i> | 36.5    | 930.1      | 1.8            | 72.4      |
| Microglia        | <i>TREM2</i>  | 20.5    | 391.3      | 55.1           | 0.2       |
|                  | <i>P2RY12</i> | 48.7    | 1152.2     | 2.9            | 4.2       |
|                  | <i>SALL1</i>  | 11.4    | 93.9       | 6.8            | 0.0       |
| Monocyte         | <i>CCR2</i>   | 0.1     | 1.8        | 0.3            | 101.7     |
|                  | <i>VCAN</i>   | 8.8     | 7.0        | 0.5            | 412.6     |
|                  | <i>MYB</i>    | 0.3     | 0.0        | 0.0            | 2.3       |
| Neuron           | <i>MAP2</i>   | 137.3   | 0.6        | 0.1            | 0.0       |
|                  | <i>RBFOX3</i> | 63.5    | 0.9        | 0.0            | 0.3       |
| Astrocyte        | <i>GFAP</i>   | 1215.1  | 2.5        | 0.9            | 0.7       |
| Oligoden.        | <i>MBP</i>    | 10493.9 | 8.5        | 6.0            | 29.8      |
|                  | <i>MOBP</i>   | 275.1   | 0.3        | 0.0            | 0.0       |
| Other            | <i>TTR</i>    | 0.1     | 0.0        | 0.0            | 0.0       |
|                  | <i>VIM</i>    | 113.3   | 26.4       | 763.5          | 1025.8    |
|                  | <i>OCN</i>    | 0.3     | 0.1        | 0.0            | 0.0       |
|                  | <i>NES</i>    | 7.8     | 0.0        | 0.2            | 0.0       |

Figure S2
