# Supplementary material
Source: PubMed Central journal article supplement (PMC5858585)
Supplement: NIHMS948147-supplement-Supplemental_Figure_09.pdf [file NIHMS948147-supplement-Supplemental_Figure_09.pdf]

### A Human - H3K4me2 ChIP-seq

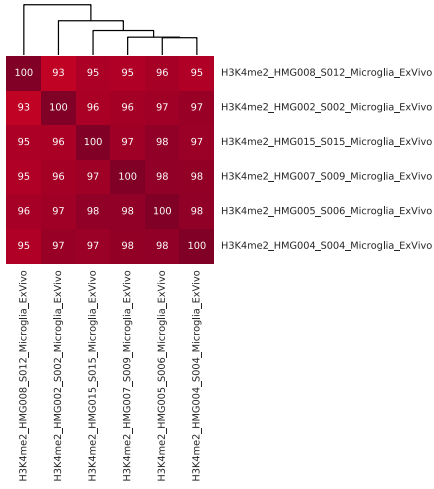

### B Human - H3K27ac ChIP-seq

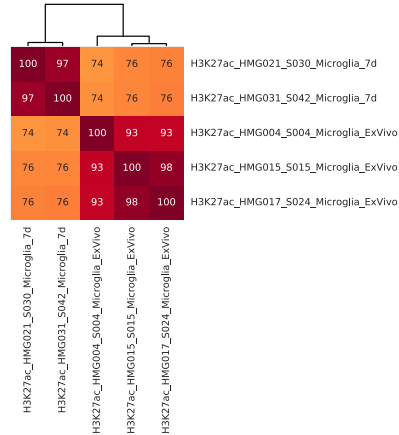

### C Human - PU.1 ChIP-seq

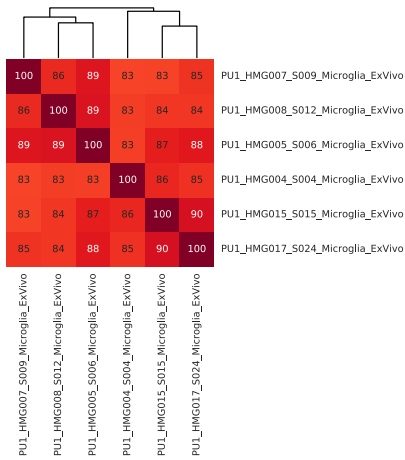

### D Human - ATAC-seq

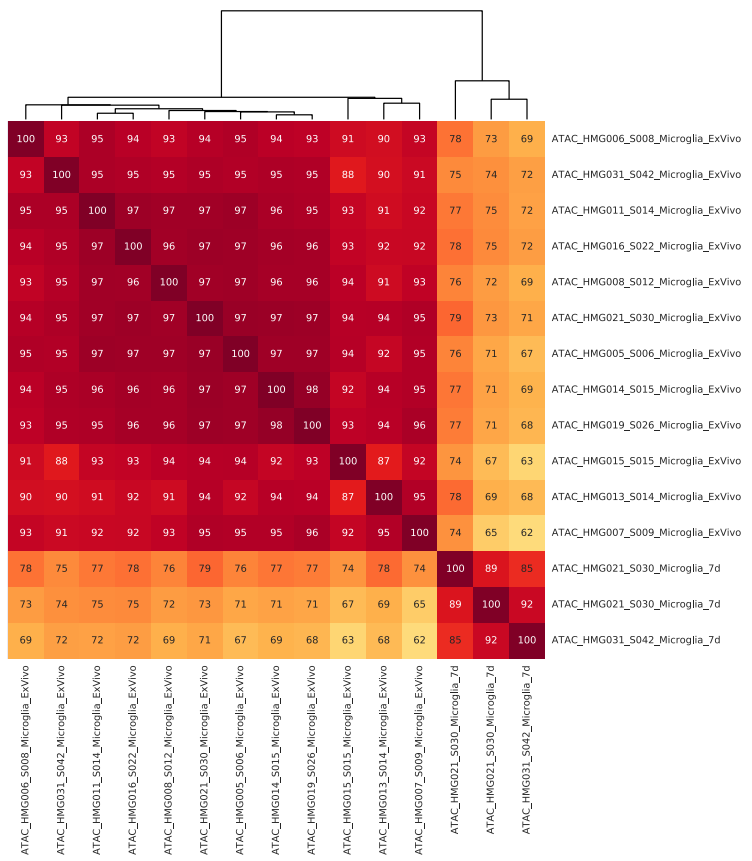

Figure S9

**E** Mouse - H3K4me2 ChIP-seq

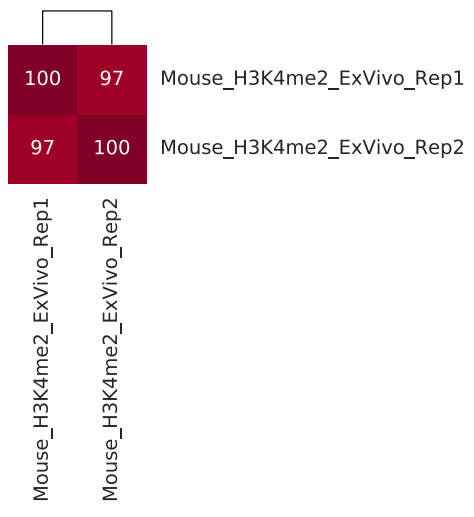

**F** Mouse - H3K27ac ChIP-seq

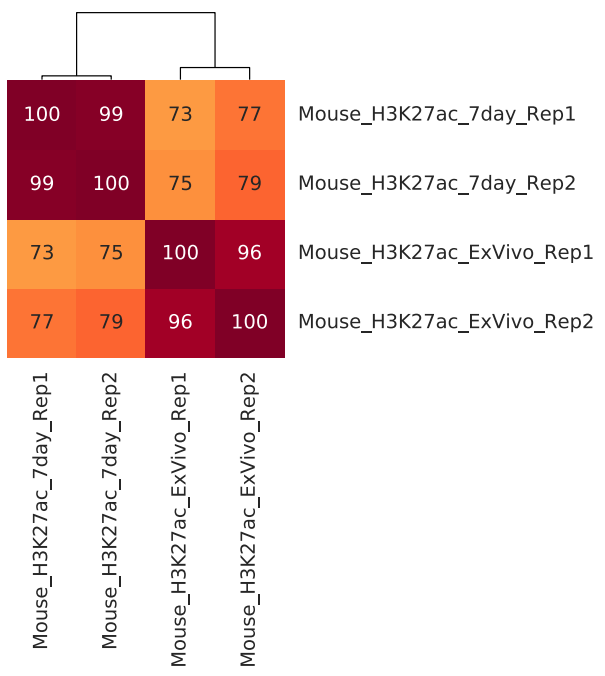

**G** Mouse - PU.1 ChIP-seq

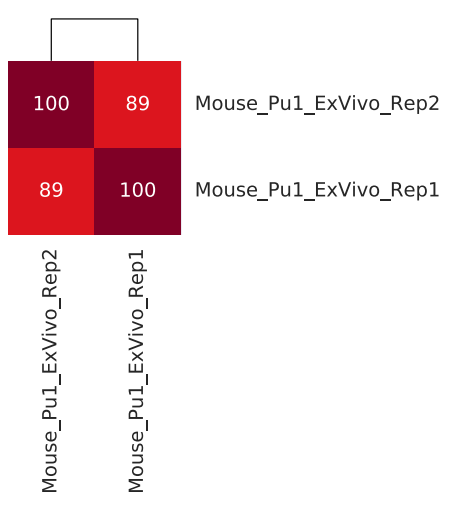

**H** Mouse - ATAC-seq

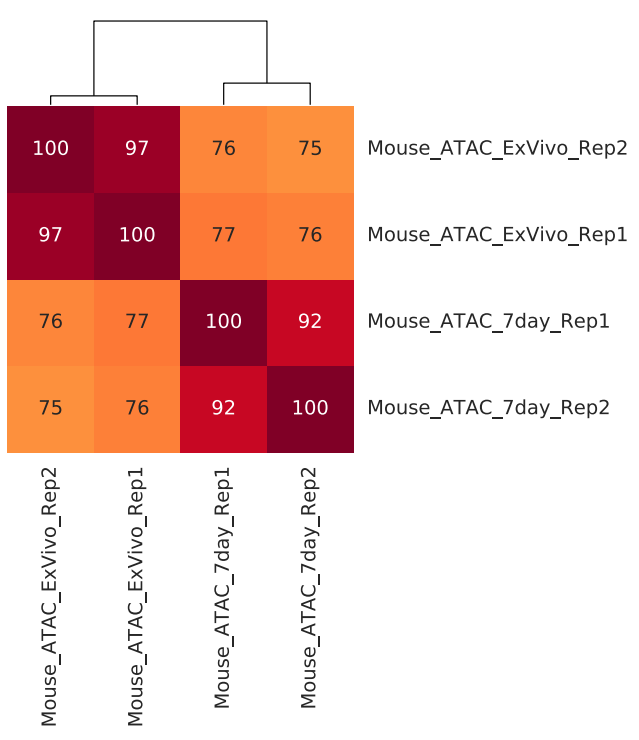

Figure S9
