# Supplementary material
Source: PubMed Central journal article supplement (PMC5858585)
Supplement: NIHMS948147-supplement-Supplemental_Figure_10.pdf [file NIHMS948147-supplement-Supplemental_Figure_10.pdf]

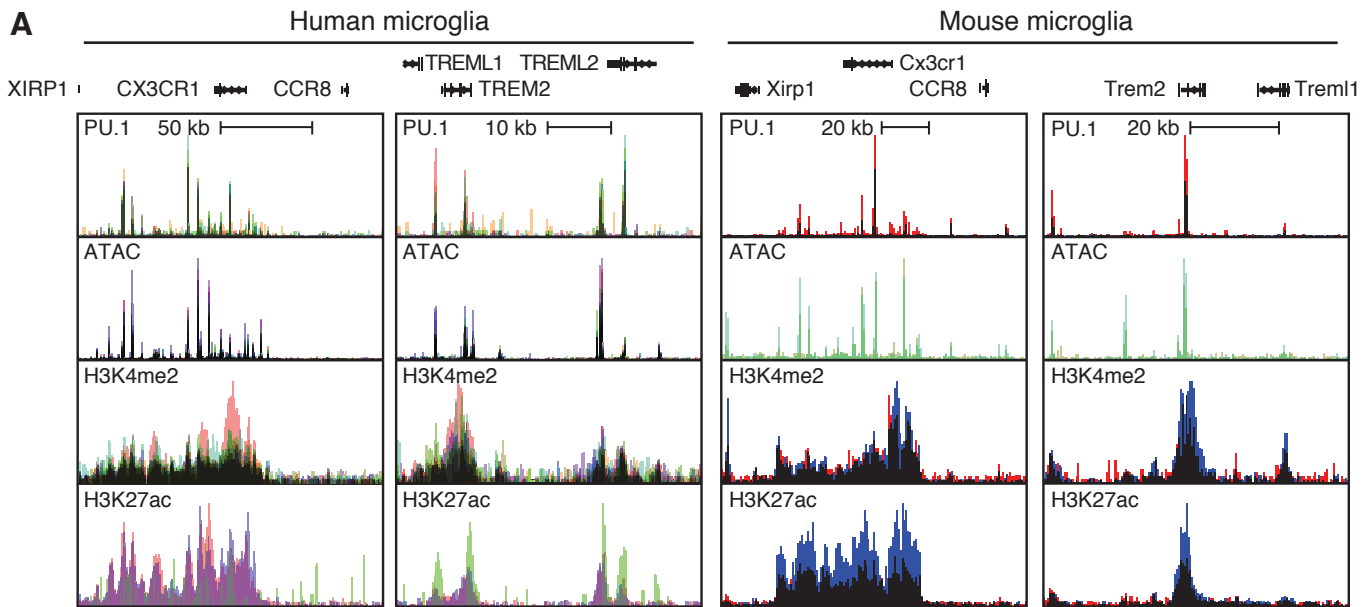

**B**

**ATAC/H3K4me2 peaks**

| Motif       | Human microglia |         |           | Mouse microglia |         |           |
|-------------|-----------------|---------|-----------|-----------------|---------|-----------|
|             | Rank            | p-value | Targ/Bkgd | Rank            | p-value | Targ/Bkgd |
| <b>PU.1</b> | 1               | 1e-2385 | 41/9      | 1               | 1e-2817 | 58/13     |
| <b>CTCF</b> | 2               | 1e-626  | 8/1       | 2               | 1e-443  | 7/1       |
| <b>IRF</b>  | 3               | 1e-574  | 6/0.6     | 3               | 1e-393  | 13/4      |
| <b>RUNX</b> | 4               | 1e-186  | 12/6      | 5               | 1e-133  | 11/5      |
| <b>MEF2</b> | 5               | 1e-156  | 9/4       | 4               | 1e-146  | 5/2       |
| <b>CEBP</b> | 6               | 1e-135  | 10/5      | 7               | 1e-117  | 13/7      |
| <b>AP-1</b> | 7               | 1e-135  | 7/3       | 6               | 1e-126  | 10/5      |
| <b>SMAD</b> | 8               | 1e-76   | 35/29     | 9               | 1e-81   | 2/0.4     |
| <b>MAF</b>  | 9               | 1e-70   | 19/14     | 14              | 1e-35   | 1/0.4     |

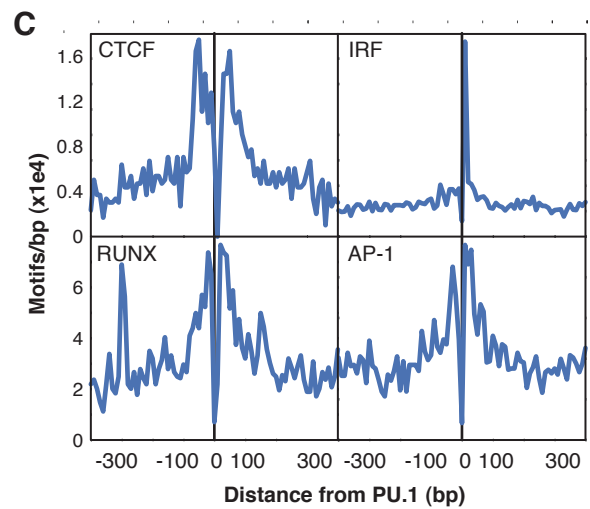

Figure S10
