# Supplementary material
Source: PubMed Central journal article supplement (PMC5858585)
Supplement: NIHMS948147-supplement-Supplemental_Figure_13.pdf [file NIHMS948147-supplement-Supplemental_Figure_13.pdf]

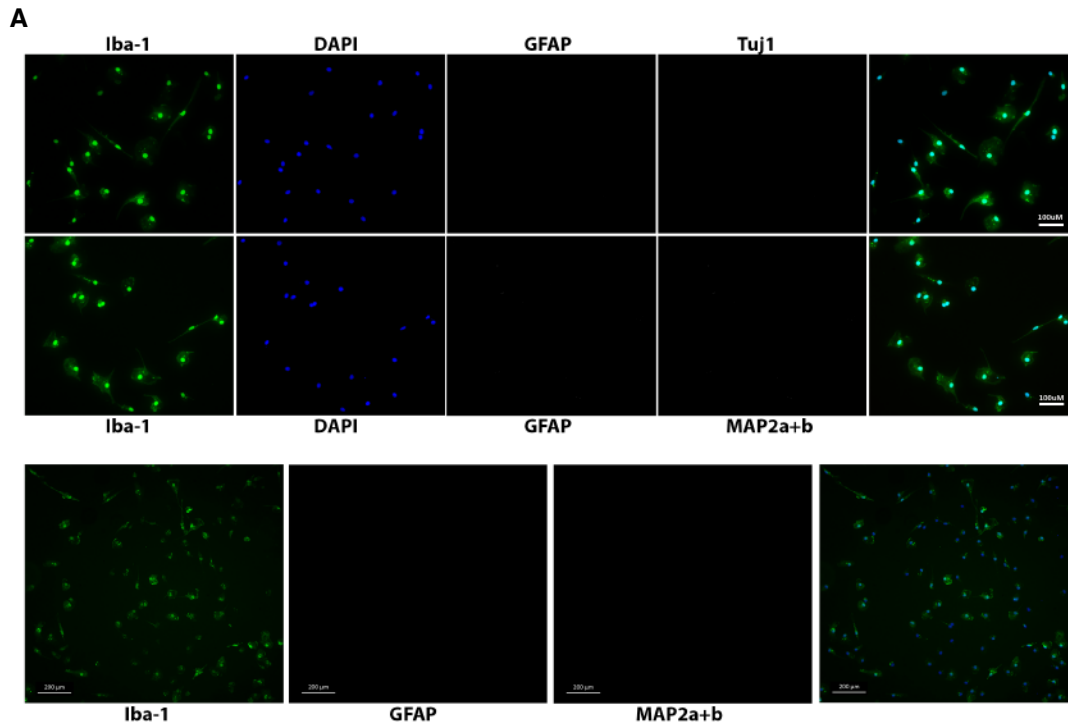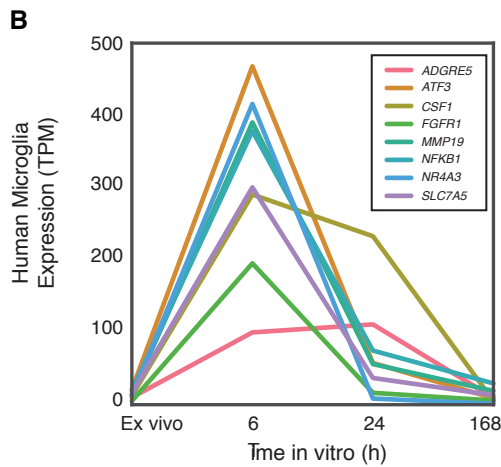

**C**

| Description                                           | q-value  |
|-------------------------------------------------------|----------|
| regulation of cellular response to stress             | 1.85E-13 |
| apoptotic signaling pathway                           | 3.84E-13 |
| cytokine production                                   | 3.37E-10 |
| positive regulation of programmed cell death          | 4.37E-10 |
| immune system development                             | 1.36E-09 |
| signal transduction by protein phosphorylation        | 1.81E-09 |
| cellular response to external stimulus                | 9.65E-09 |
| cellular response to organic cyclic compound          | 2.50E-08 |
| neg. reg. of transcription from RNA pol. II promoter  | 2.63E-08 |
| response to cytokine                                  | 3.25E-08 |
| symbiosis, encompass mutualism through parasitism     | 1.49E-07 |
| response to unfolded protein                          | 2.09E-07 |
| positive regulation of immune system process          | 2.49E-07 |
| neg. regulation of cellular protein metabolic process | 3.25E-07 |
| response to molecule of bacterial origin              | 4.20E-07 |
| protein refolding                                     | 9.42E-07 |
| cellular macromolecule catabolic process              | 1.89E-06 |

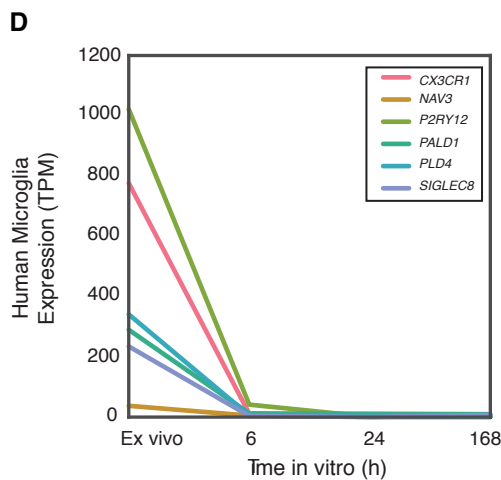

**E**

| Description                                        | q-value  |
|----------------------------------------------------|----------|
| response to cytokine                               | 4.45E-10 |
| Inflammatory bowel disease (IBD)                   | 3.57E-08 |
| leukocyte cell-cell adhesion                       | 4.23E-08 |
| anato. struct. formation involved in morphogenesis | 6.57E-07 |
| hematopoietic or lymphoid organ development        | 1.83E-05 |
| response to organic cyclic compound                | 8.99E-05 |
| chemotaxis                                         | 0.000138 |
| regulation of GTPase activity                      | 0.000156 |
| MAPK signaling pathway                             | 0.000226 |
| leukocyte apoptotic process                        | 0.000233 |
| cellular response to calcium ion                   | 0.000284 |
| regulation of locomotion                           | 0.000521 |
| regulation of neurogenesis                         | 0.000601 |
| inflammatory response                              | 0.000648 |
| telencephalon development                          | 0.000704 |
| positive reg. of intracellular signal transduction | 0.000780 |

Figure S13
