# Supplementary material
Source: PubMed Central journal article supplement (PMC5858585)
Supplement: NIHMS948147-supplement-Supplemental_Figure_16.pdf [file NIHMS948147-supplement-Supplemental_Figure_16.pdf]

**A**

PCA analysis  
Human microglia RNA-seq  
Media composition experiments

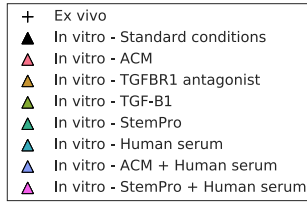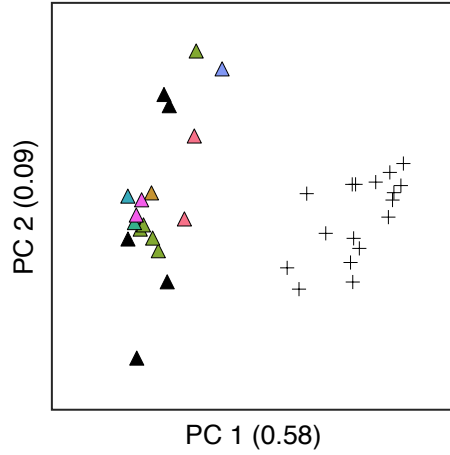**B**

Human RNA-seq samples  
Pearson correlation coefficient comparisons

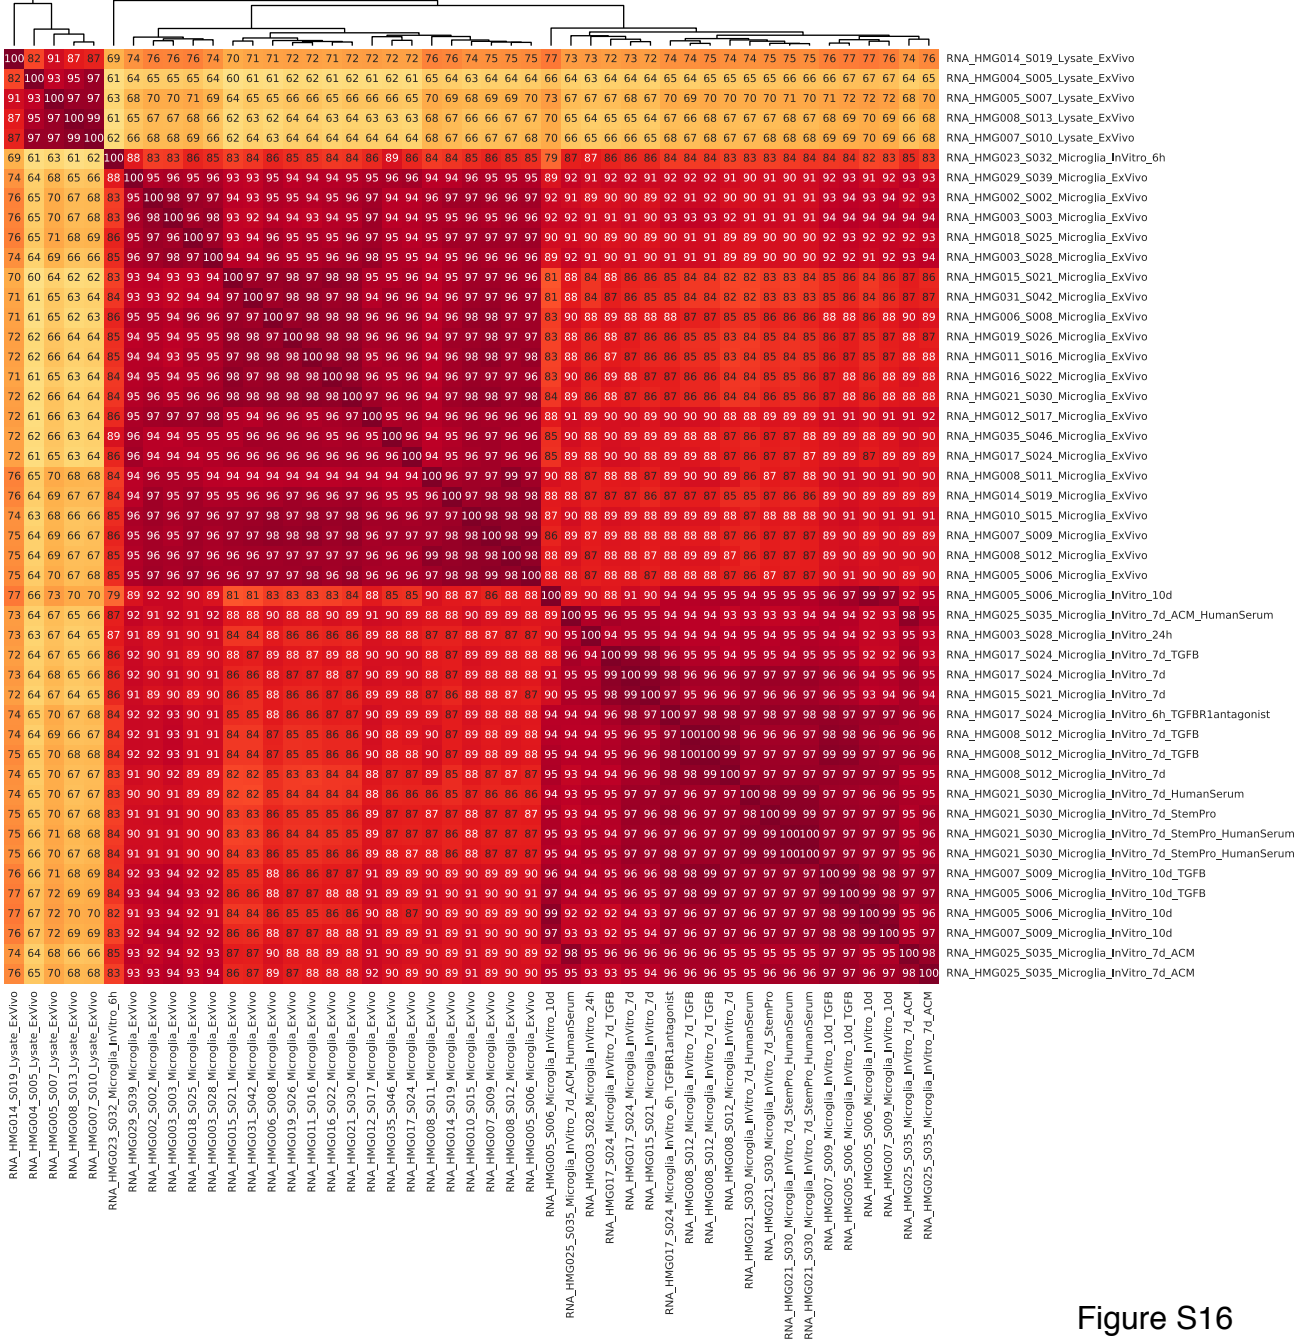

Figure S16
