# Supplementary material
Source: PubMed Central journal article supplement (PMC5858585)

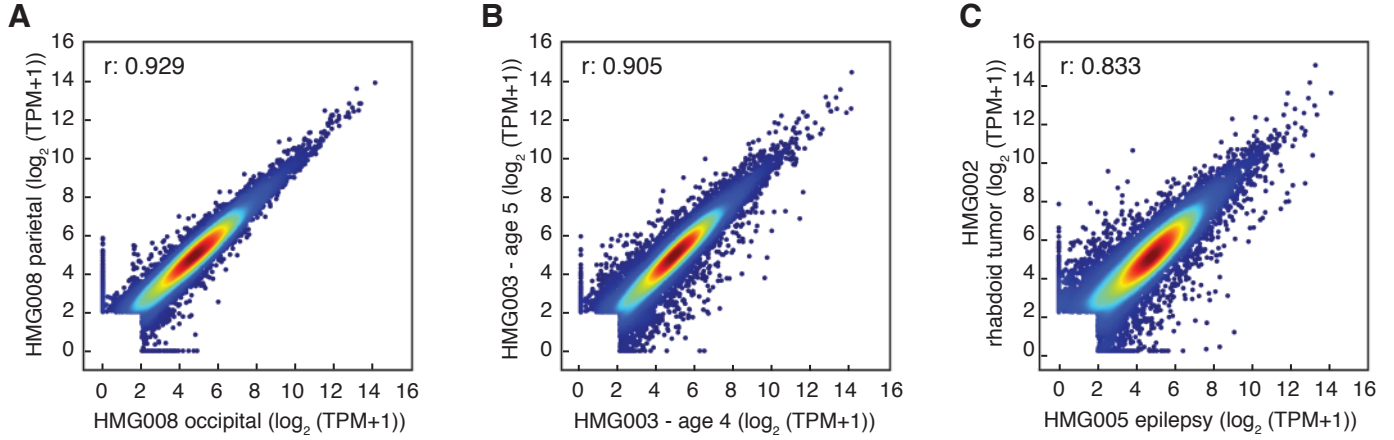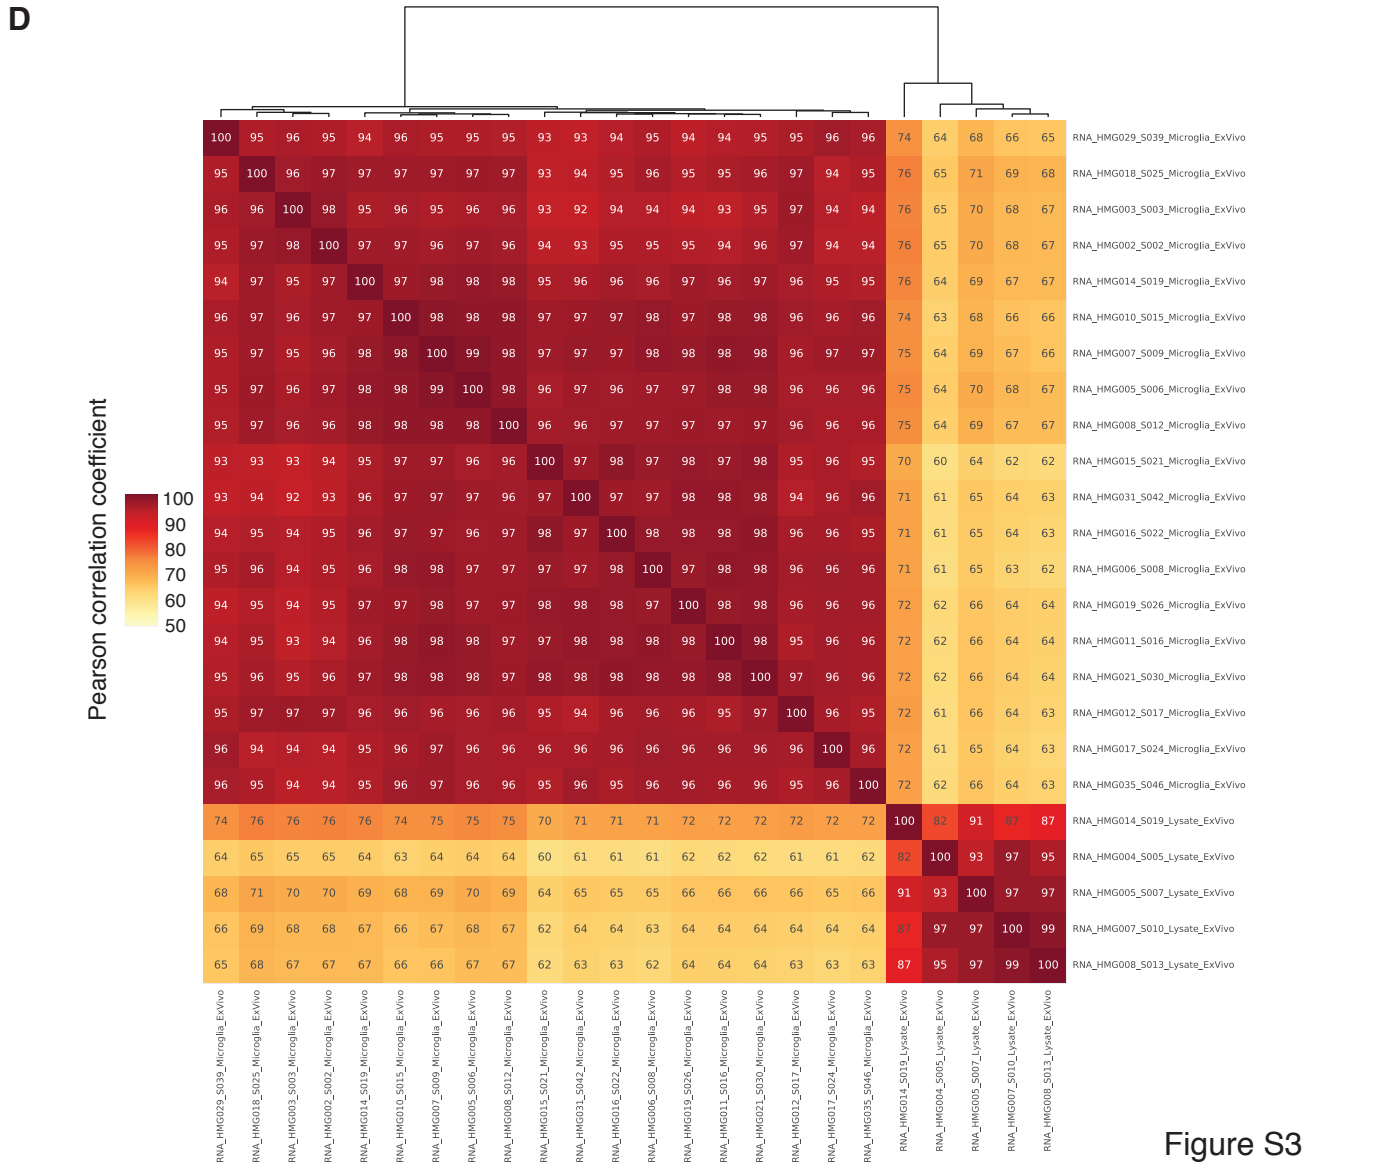

Figure S3

Supplement: NIHMS948147-supplement-Supplemental_Figure_03.pdf [file NIHMS948147-supplement-Supplemental_Figure_03.pdf]

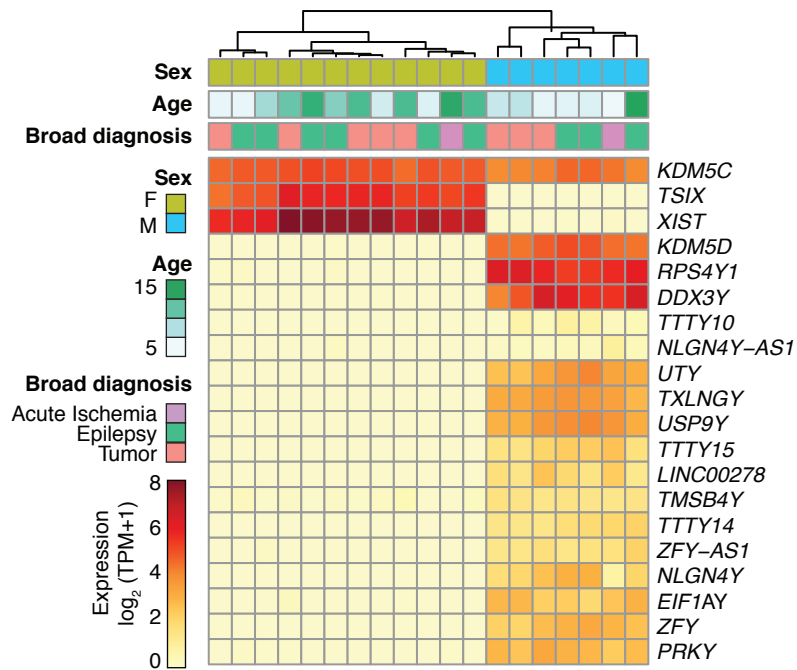

Figure S4

Supplement: NIHMS948147-supplement-Supplemental_Figure_04.pdf [file NIHMS948147-supplement-Supplemental_Figure_04.pdf]

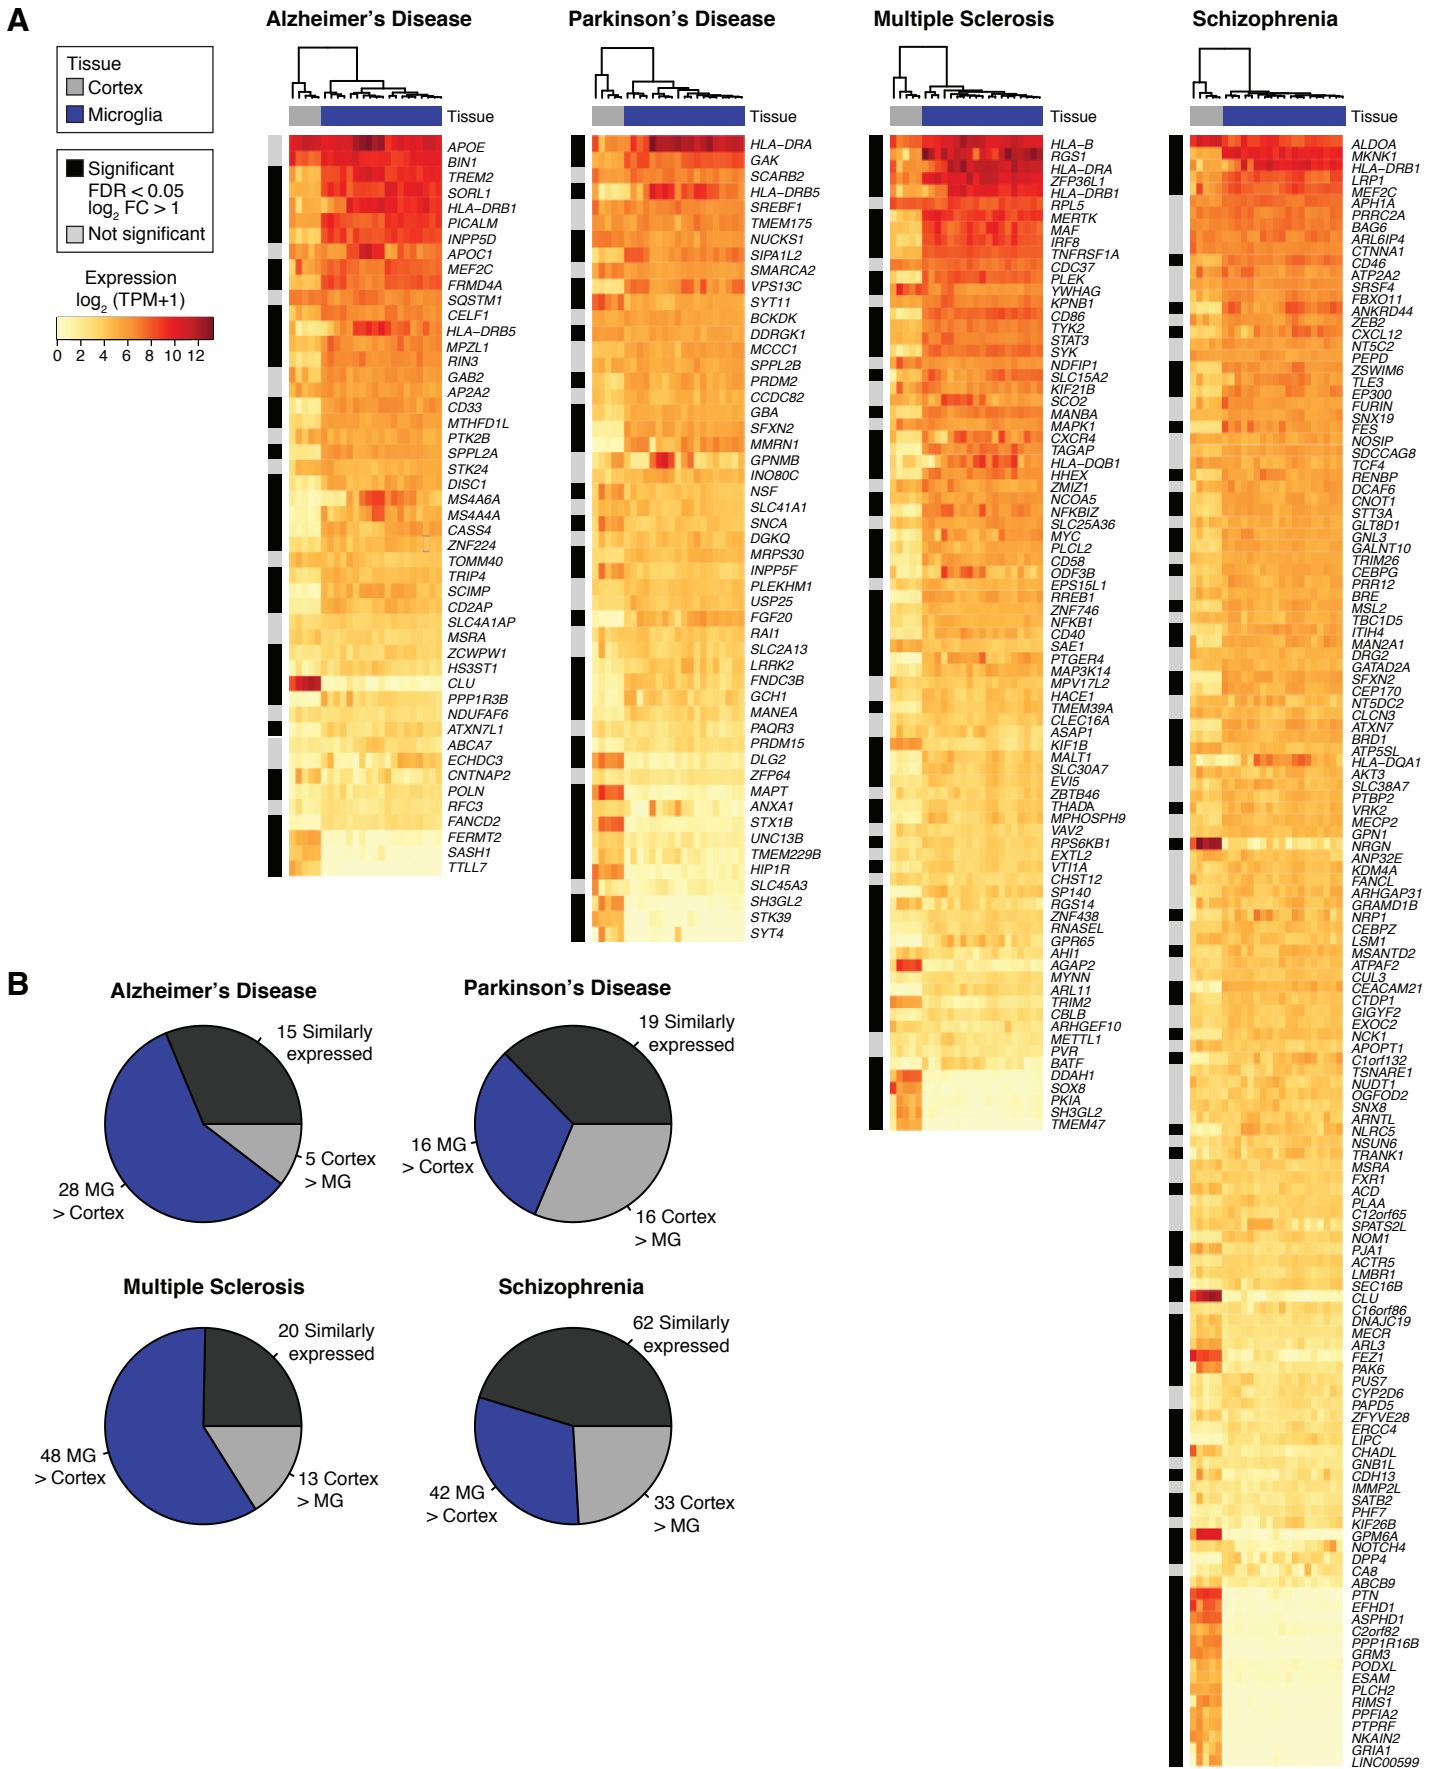

Figure S5

Supplement: NIHMS948147-supplement-Supplemental_Figure_05.pdf [file NIHMS948147-supplement-Supplemental_Figure_05.pdf]

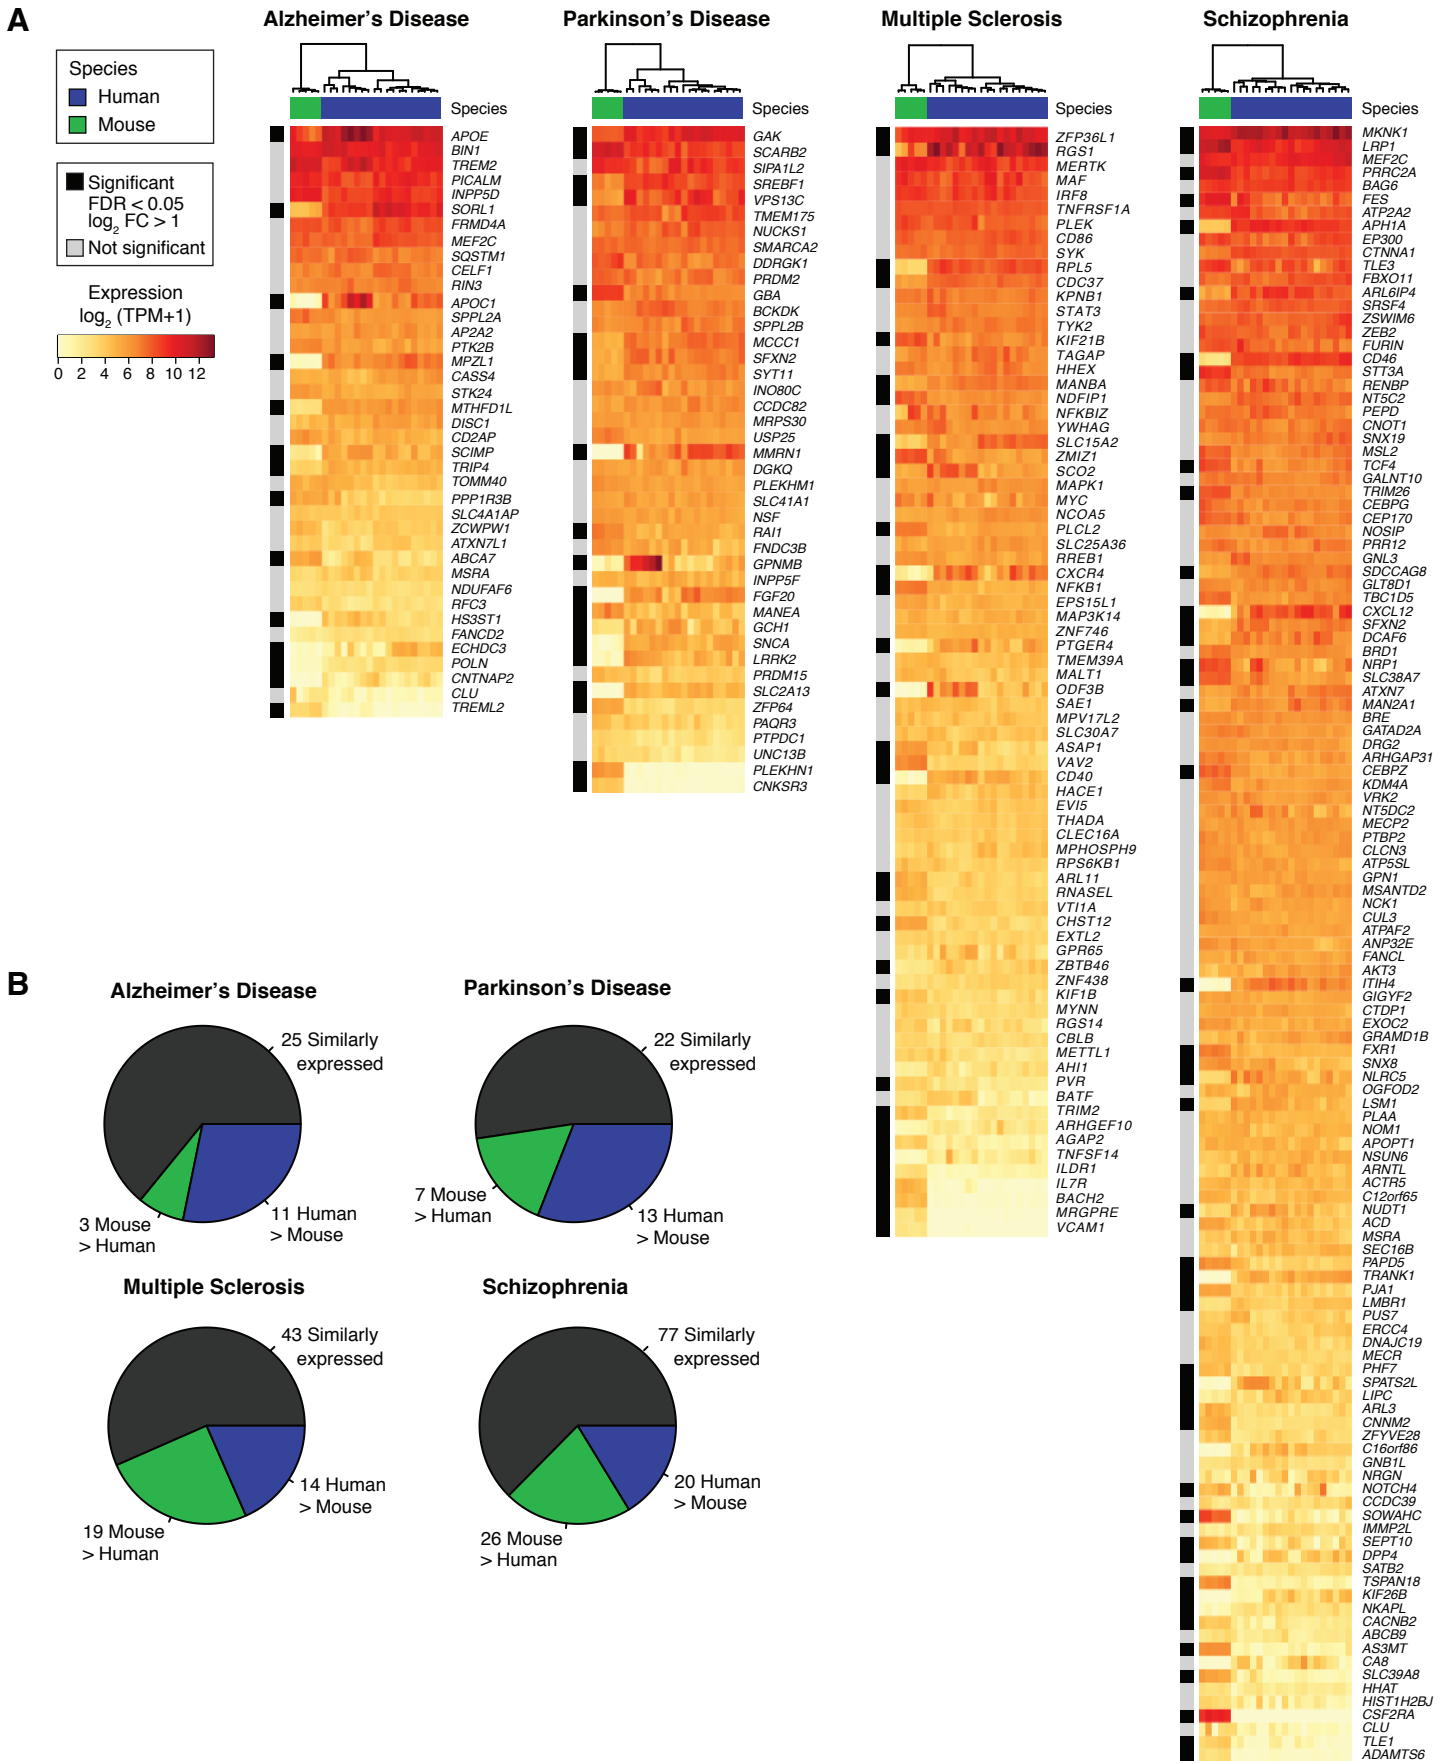

Figure S8

Supplement: NIHMS948147-supplement-Supplemental_Figure_08.pdf [file NIHMS948147-supplement-Supplemental_Figure_08.pdf]

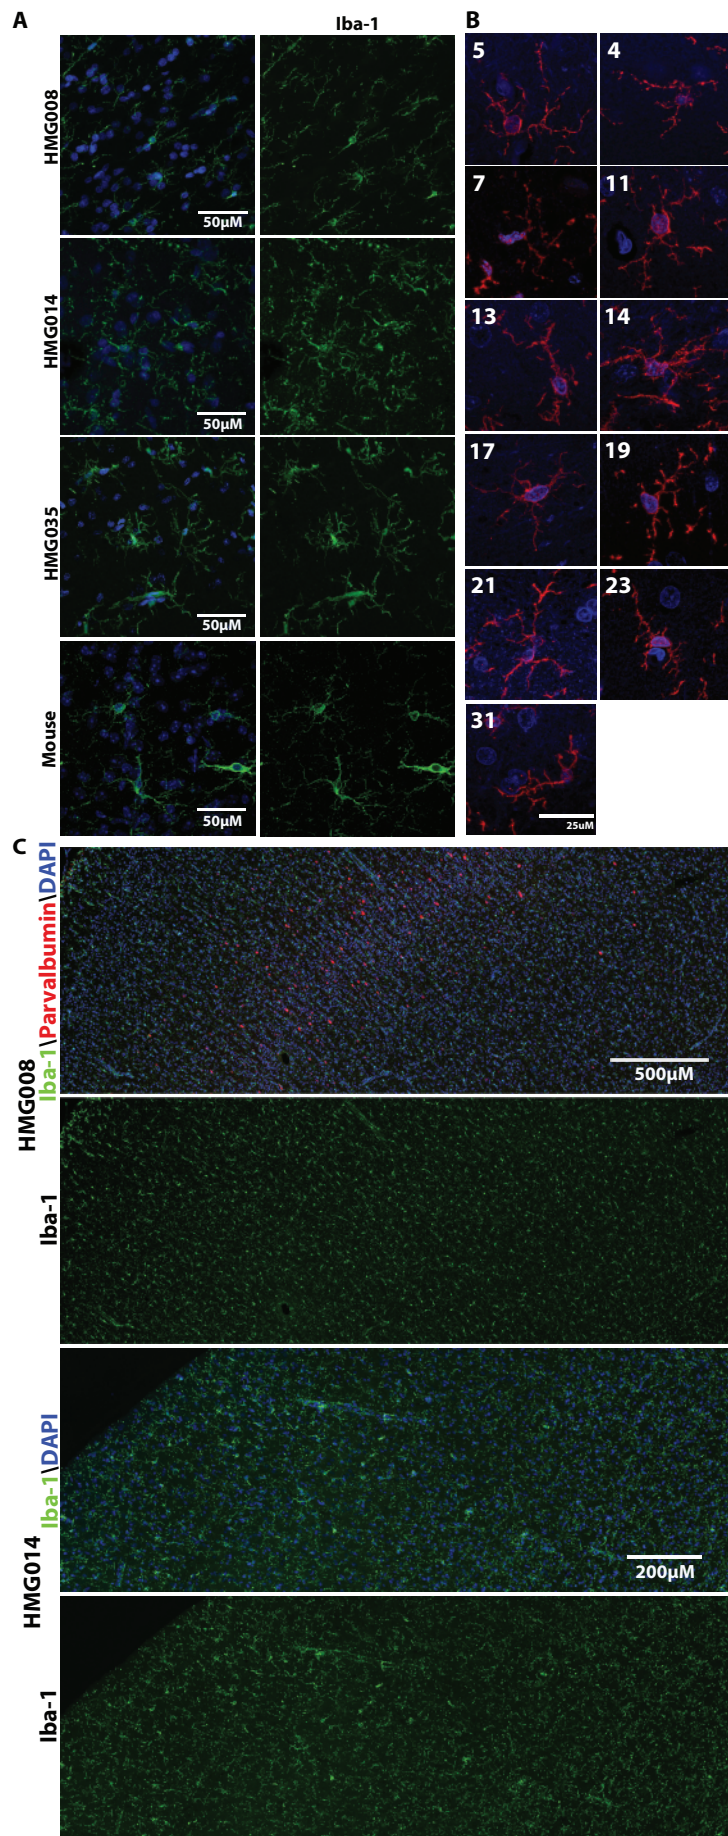

Figure S1

Supplement: NIHMS948147-supplement-Supplemental_Figure_1.pdf [file NIHMS948147-supplement-Supplemental_Figure_1.pdf]

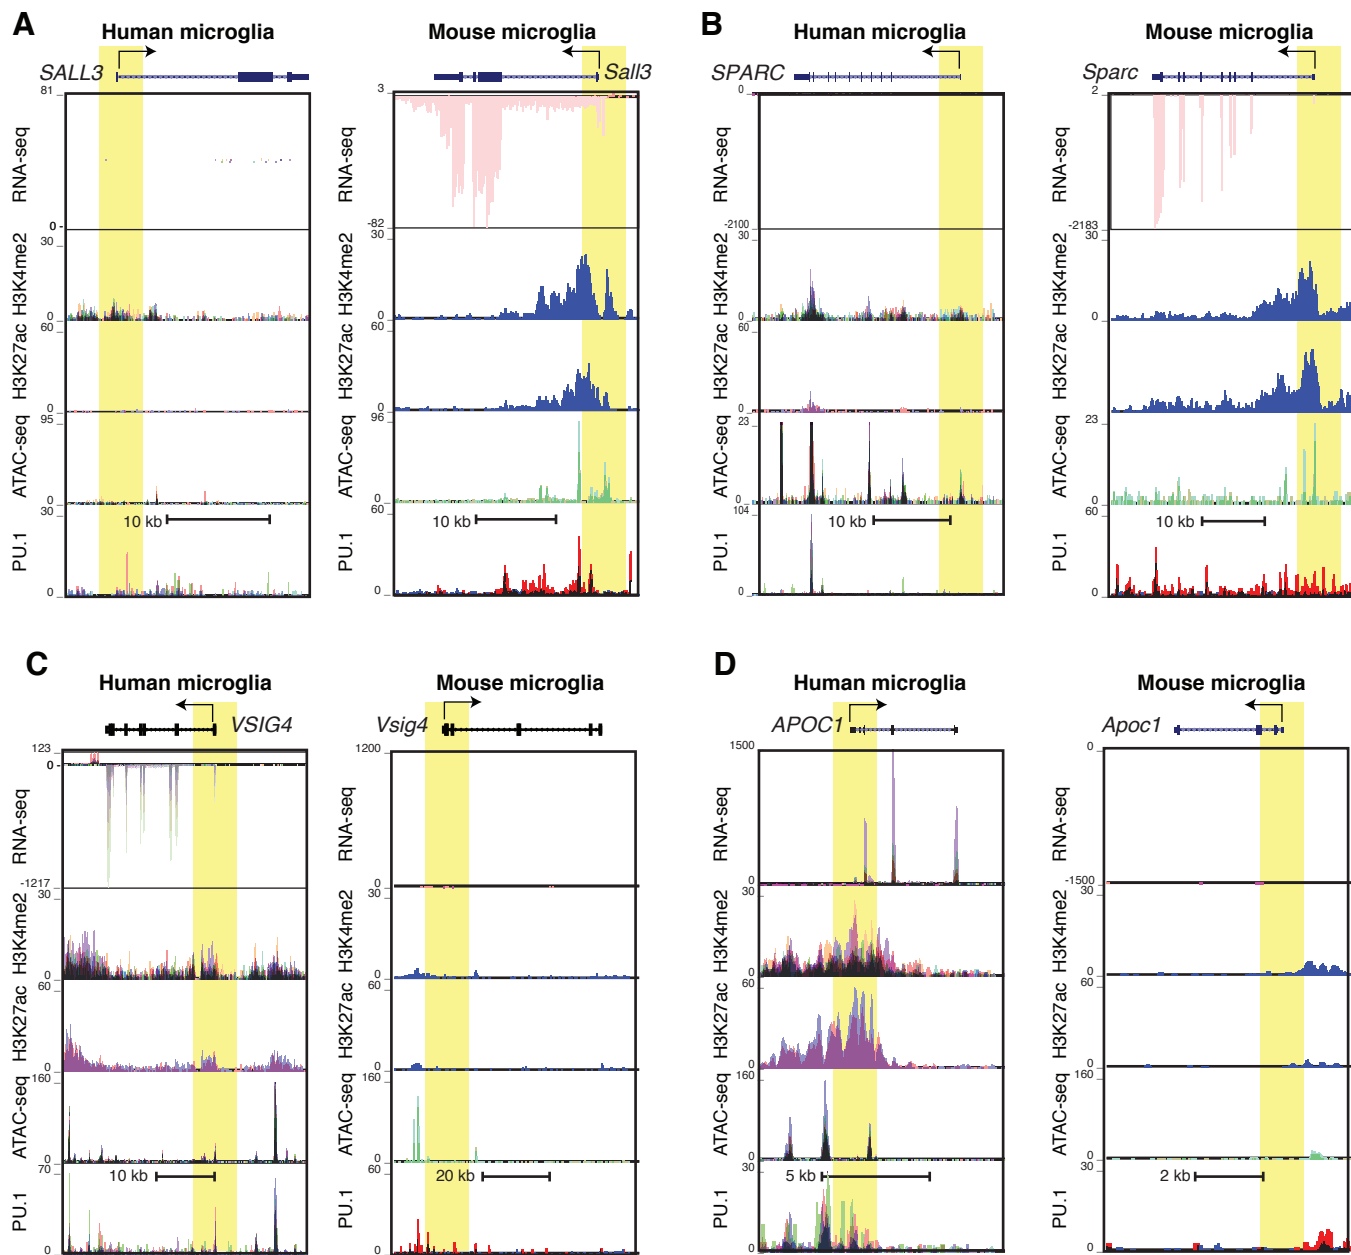

Figure S11

Supplement: NIHMS948147-supplement-Supplemental_Figure_11.pdf [file NIHMS948147-supplement-Supplemental_Figure_11.pdf]

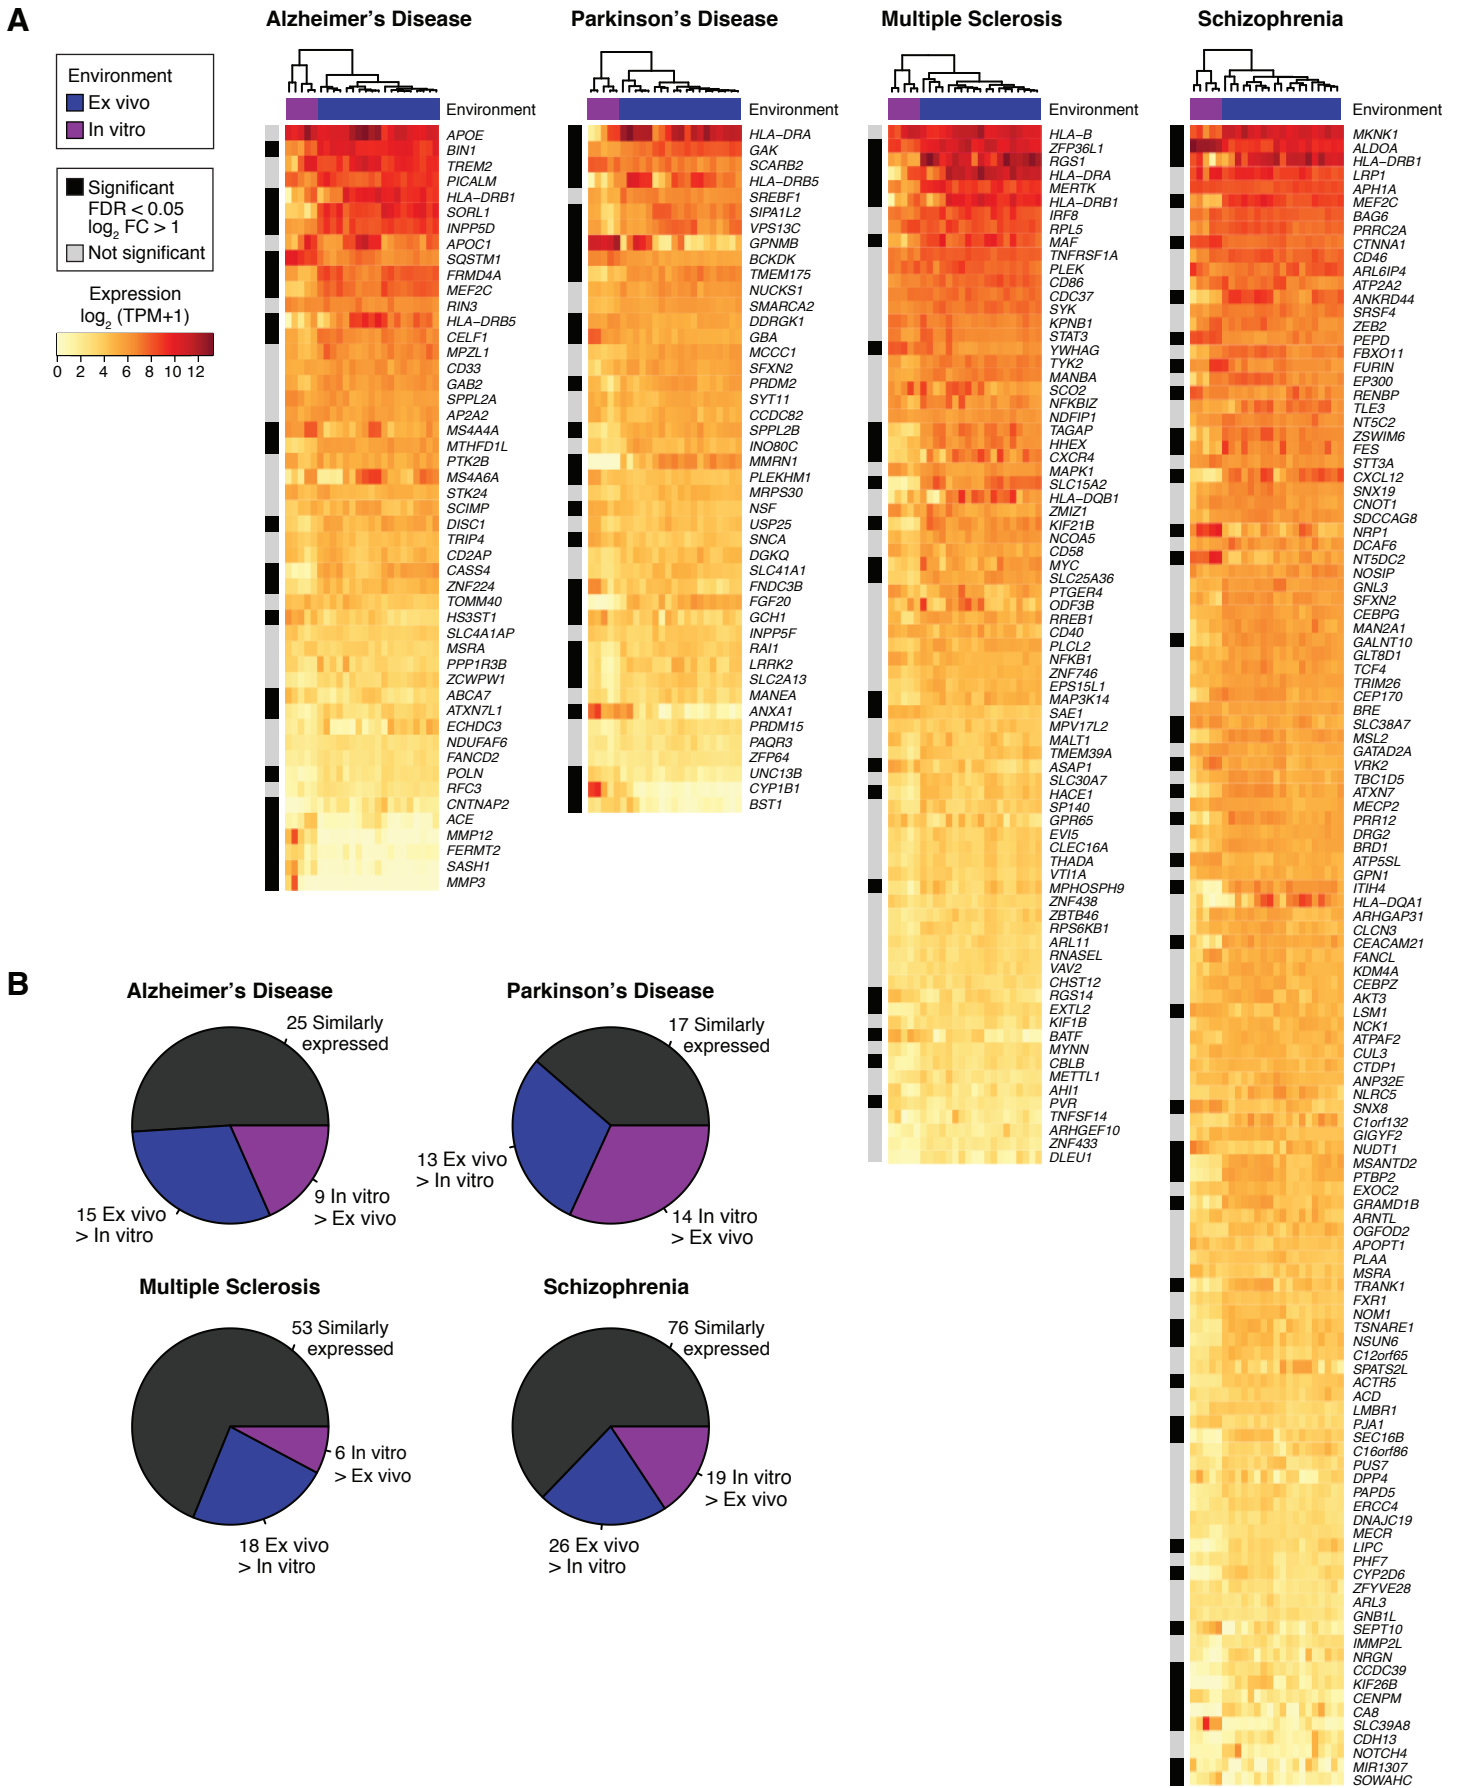

Figure S12

Supplement: NIHMS948147-supplement-Supplemental_Figure_12.pdf [file NIHMS948147-supplement-Supplemental_Figure_12.pdf]

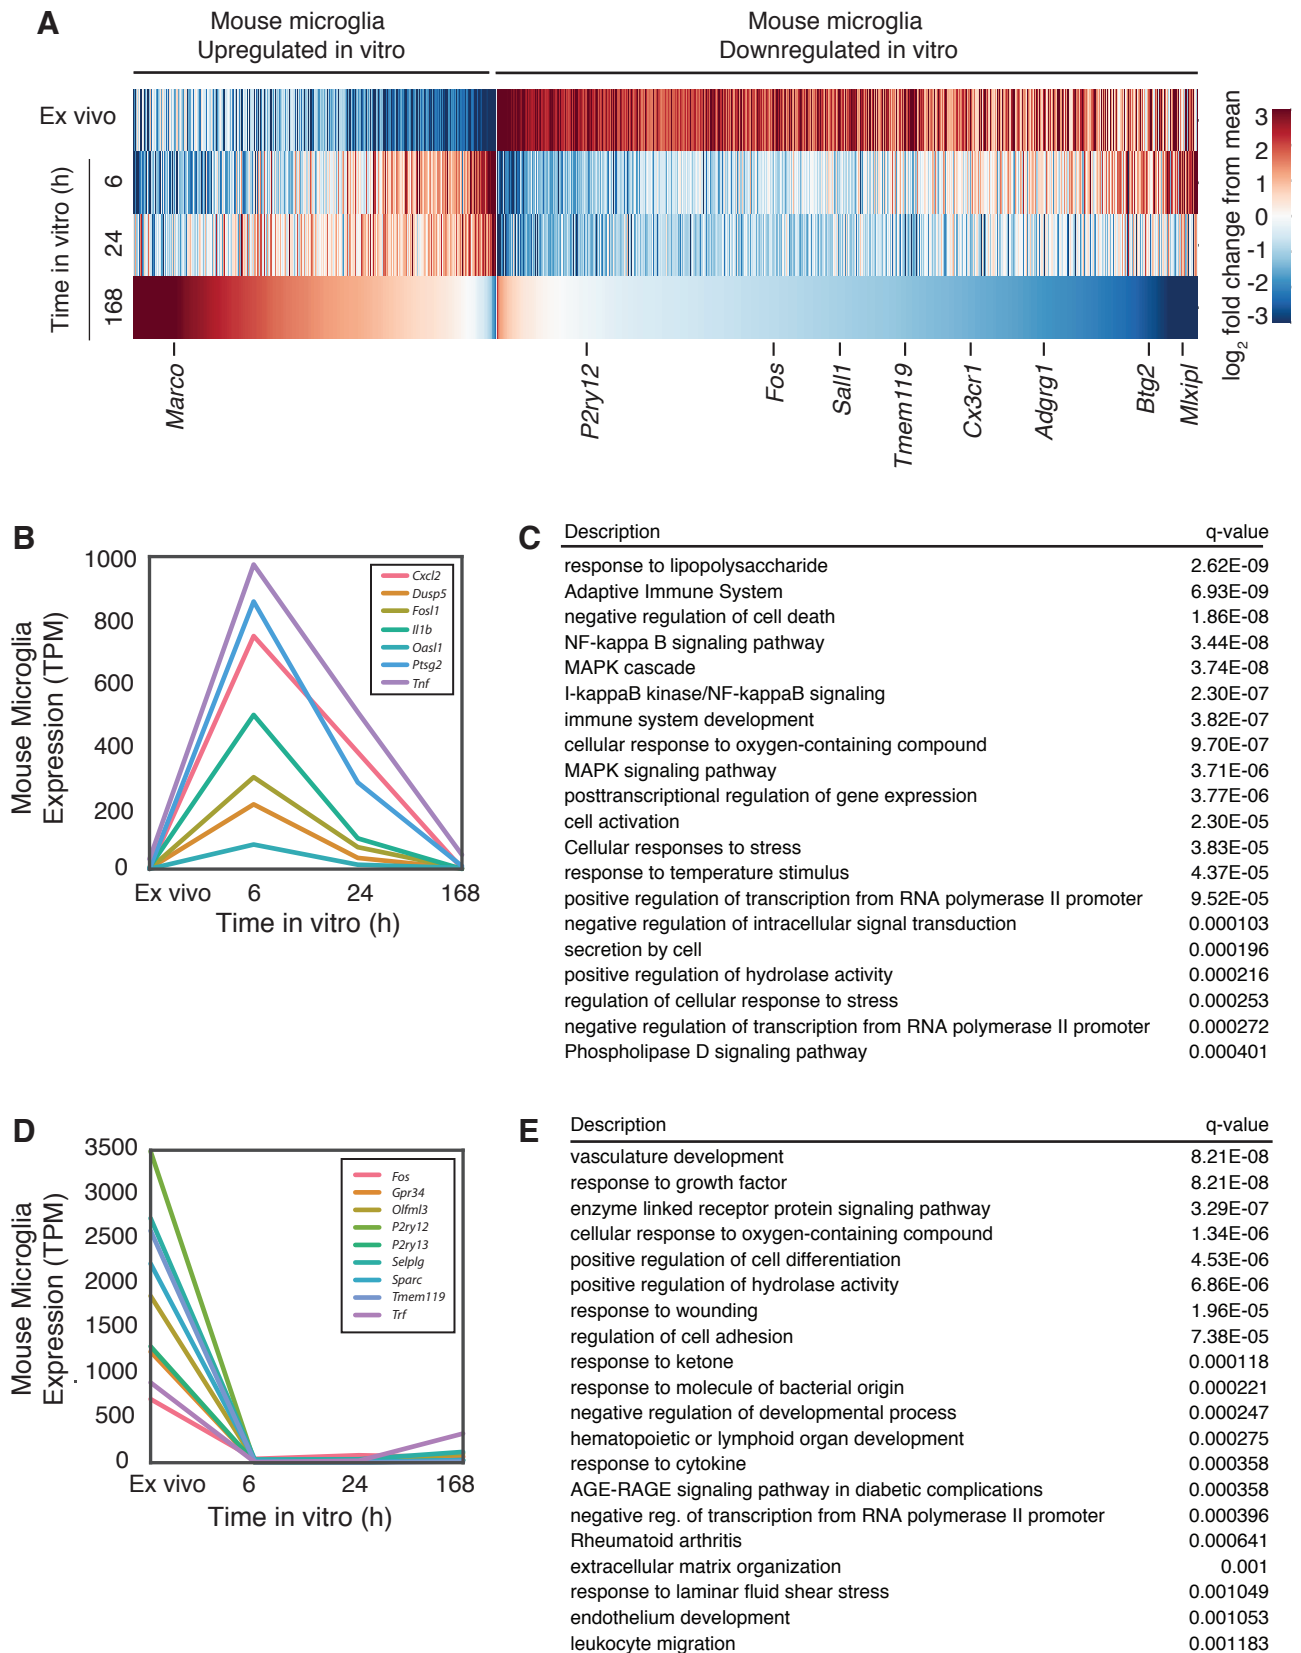

Figure S14

Supplement: NIHMS948147-supplement-Supplemental_Figure_14.pdf [file NIHMS948147-supplement-Supplemental_Figure_14.pdf]

**A** Mouse microglia

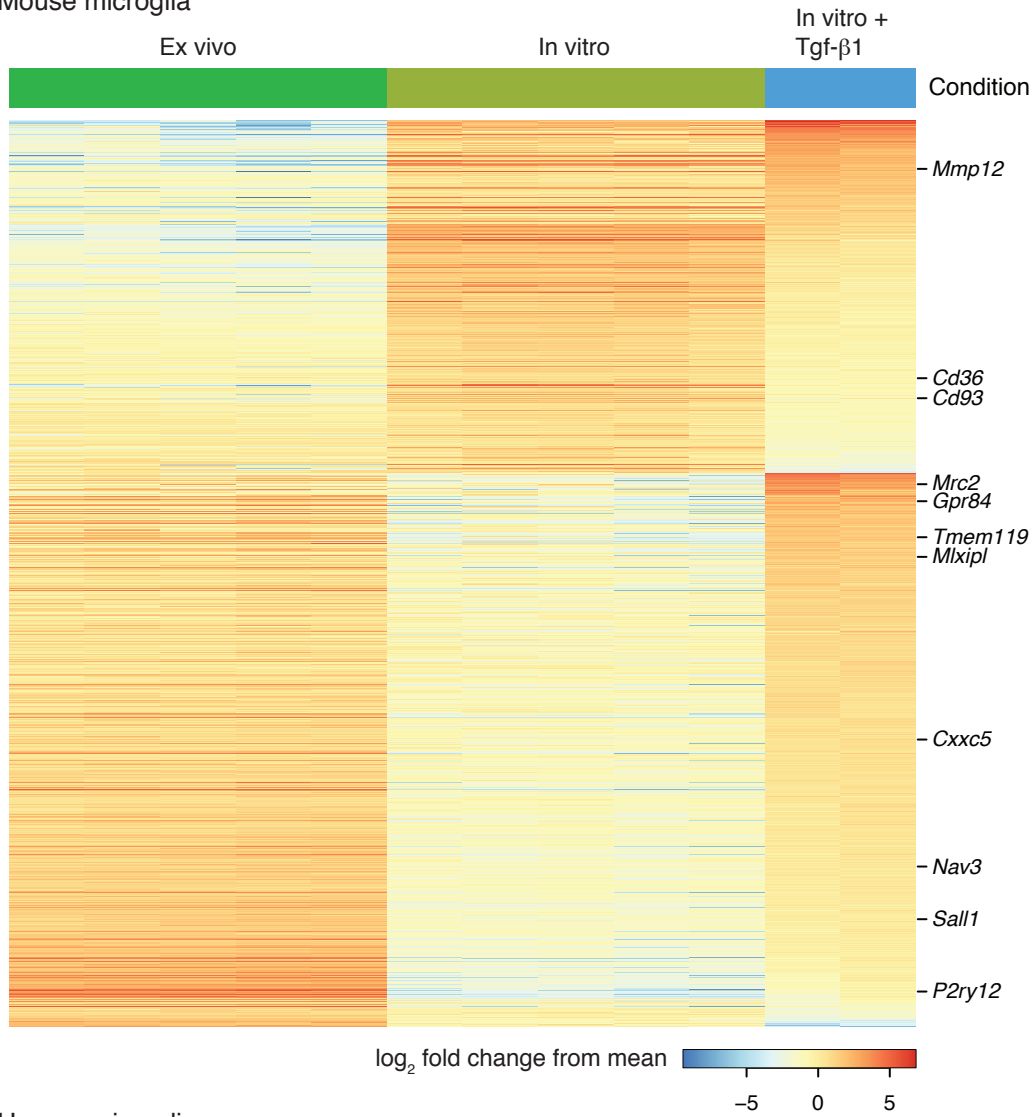

**B** Human microglia

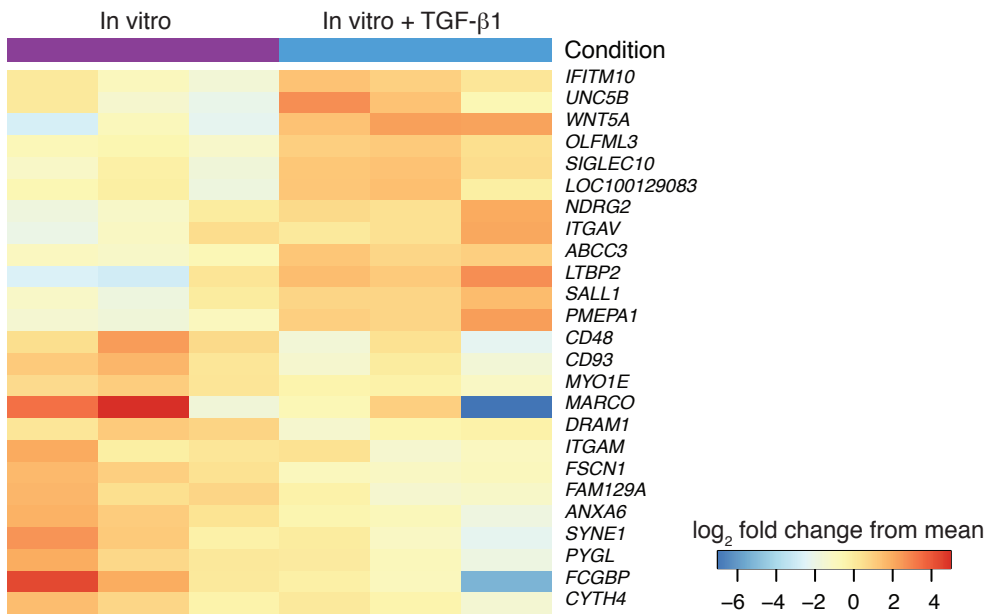

Figure S15

Supplement: NIHMS948147-supplement-Supplemental_Figure_15.pdf [file NIHMS948147-supplement-Supplemental_Figure_15.pdf]

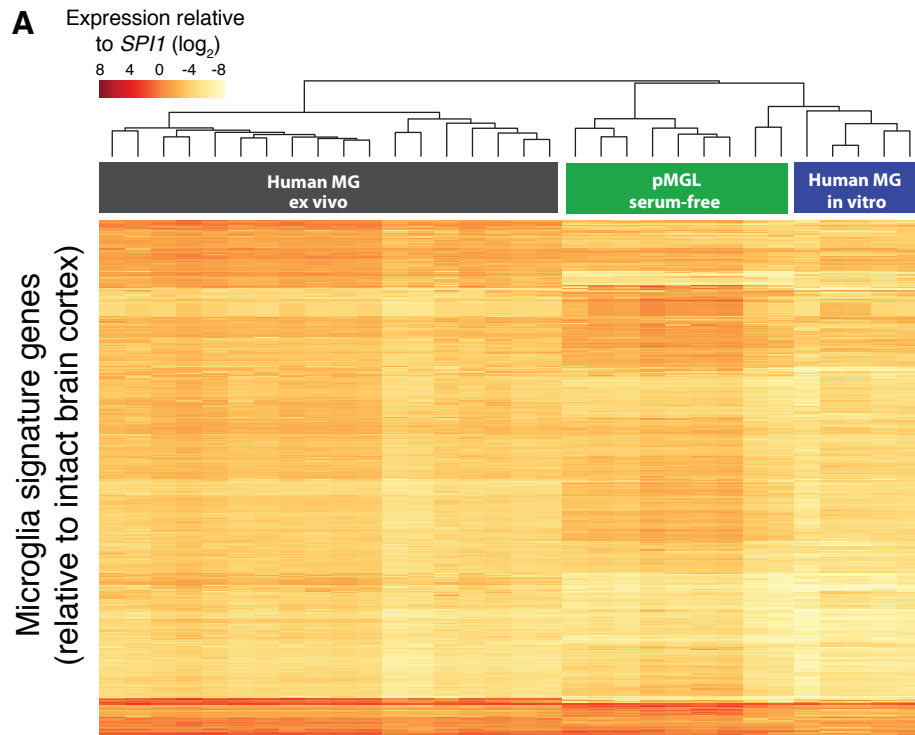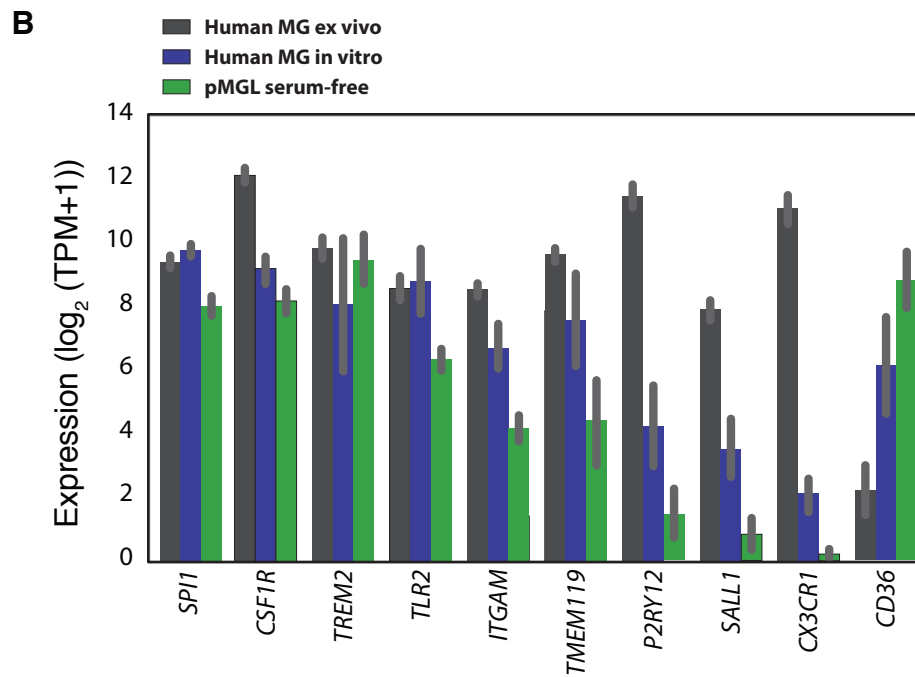

Figure S17

Supplement: NIHMS948147-supplement-Supplemental_Figure_17.pdf [file NIHMS948147-supplement-Supplemental_Figure_17.pdf]

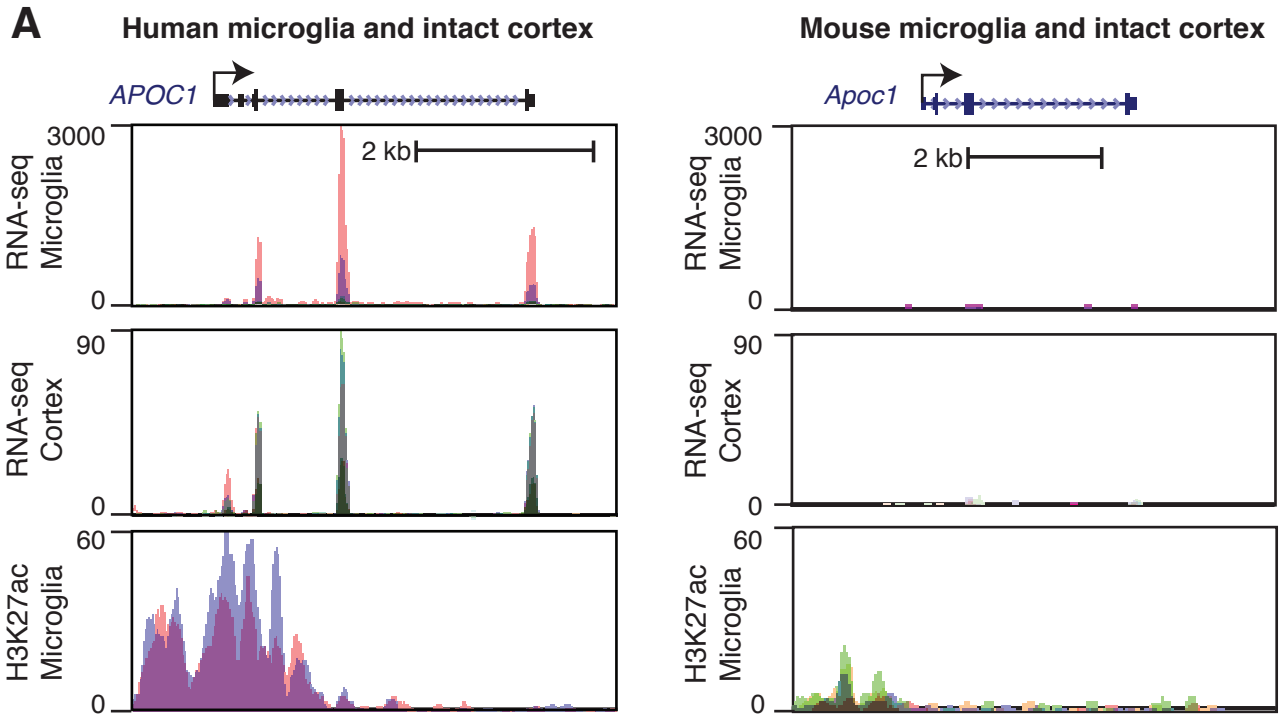

**B** Genes 10X > in microglia compared to intact cortex (human and mouse)

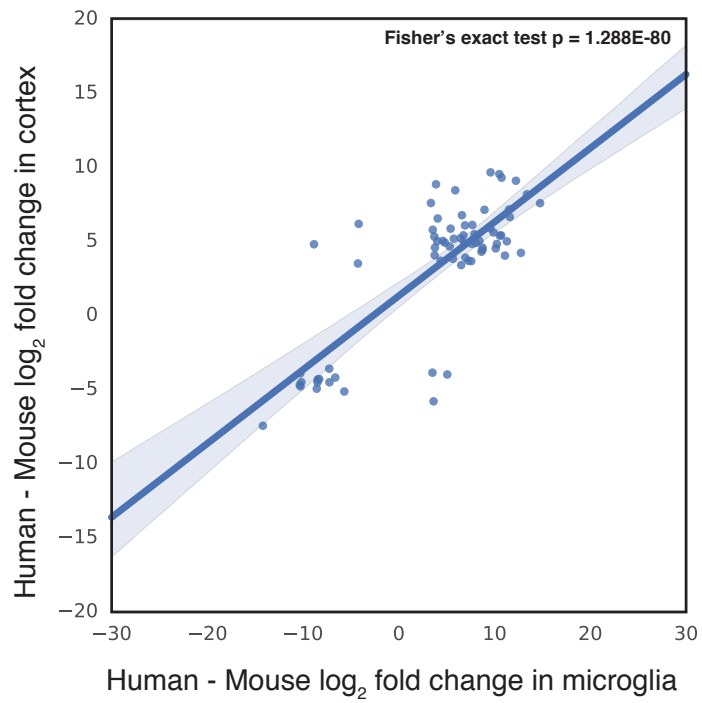

Figure S7

Supplement: NIHMS948147-supplement-Supplemental_Figure_7.pdf [file NIHMS948147-supplement-Supplemental_Figure_7.pdf]
